# Supplementary material for: Effect of various nitrogen levels on growth and yield of different varieties of pearl millet [Pennisetum glaucum (L.) R.Br.] under shisham (Dalbergia sissoo) based silvi-pastoral system
Source: Research Square preprint supplement (doi:10.21203/rs.3.rs-6113698/v1), 2025-04-14
Supplement: Supplementary file 1 [file 54fb8e7260a83ca804d60eae.docx]

**Supplementary Materials**

**Supplementary Table 1:** Common cost of cultivation for pearl millet

| **S. No.** | **Operations** | **Input** | | **Rate (₹)** | **Cost (₹ ha-1)** |
| --- | --- | --- | --- | --- | --- |
| 1 | Land preparation | | | | |
| (i) One deep ploughing by soil turning plough | One tractor (35HP) for 2 hrs | 800 hr-1 | | 1600 |
| (ii) Harrowing and planking | One tractor (35HP) for 2 hrs | 800 hr-1 | | 1600 |
| 2 | Layout Preparation | 4 man days | 220 day-1 | | 880 |
| 4 | Seed | 4 kg | 200 kg-1 | | 800 |
| 3 | Seed sowing | 6 man days | 220 day-1 | | 1320 |
| 5 | Fertilizer application as basal | 2 man days | 220 day-1 | | 440 |
| 6 | Thinning and weeding | 8 man days | 220 day-1 | | 1760 |
| 7 | Harvesting | 6 man days | 220 day-1 | | 1320 |
| 8 | Land lease | For 6 months | 24000 annum-1 | | 12000 |
| Common cost of cultivation (CC) | | | | | 21720 |

| **Treatments** | **Inputs** | | | | **Cost of inputs** | | | | **Treatment cost (TC)** |
| --- | --- | --- | --- | --- | --- | --- | --- | --- | --- |
| **Fertilizer dose (kg ha-1)** | | | **Labour (Man day ha-1)** | **Fertilizer (₹ ha-1)** | | | **Labour @ 220 ₹ man day-1** |
| **Urea** | **SSP** | **MOP** | **Urea @ 6 ₹ kg-1** | **SSP @ 12 ₹ kg-1** | **MOP @ 30 ₹ kg-1** |
| T1 | 0 | 250 | 66.66 | 2 | 0 | 3000 | 1999.8 | 440 | 5439.80 |
| T2 | 130.4 | 250 | 66.66 | 2 | 783 | 3000 | 1999.8 | 440 | 6222.38 |
| T3 | 173.9 | 250 | 66.66 | 2 | 1043 | 3000 | 1999.8 | 440 | 6483.20 |
| T4 | 217.4 | 250 | 66.66 | 2 | 1304 | 3000 | 1999.8 | 440 | 6744.14 |
| T5 | 0 | 250 | 66.66 | 2 | 0 | 3000 | 1999.8 | 440 | 5439.80 |
| T6 | 130.4 | 250 | 66.66 | 2 | 783 | 3000 | 1999.8 | 440 | 6222.38 |
| T7 | 173.9 | 250 | 66.66 | 2 | 1043 | 3000 | 1999.8 | 440 | 6483.20 |
| T8 | 217.4 | 250 | 66.66 | 2 | 1304 | 3000 | 1999.8 | 440 | 6744.14 |
| T9 | 0 | 250 | 66.66 | 2 | 0 | 3000 | 1999.8 | 440 | 5439.80 |
| T10 | 130.4 | 250 | 66.66 | 2 | 783 | 3000 | 1999.8 | 440 | 6222.38 |
| T11 | 173.9 | 250 | 66.66 | 2 | 1043 | 3000 | 1999.8 | 440 | 6483.20 |
| T12 | 217.4 | 250 | 66.66 | 2 | 1304 | 3000 | 1999.8 | 440 | 6744.14 |

**Supplementary Table 2:** Cost of cultivation for different treatments

| **Treatments** | **Green Fodder Yield (q ha-1)** | **Rate (₹ q-1)** | **Gross Return (₹ ha-1)** | **Total cost of cultivation (TC + CC)** | **Net return (₹ ha-1)** | **Benefit Cost Ratio (BCR)** |
| --- | --- | --- | --- | --- | --- | --- |
| T1 | 235.84 | 300 | 70752 | 27159.80 | 43592.20 | 1.61 |
| T2 | 245.86 | 300 | 73758 | 27942.38 | 45815.62 | 1.64 |
| T3 | 271.19 | 300 | 81357 | 28203.20 | 53153.80 | 1.88 |
| T4 | 285.88 | 300 | 85764 | 28464.14 | 57299.86 | 2.01 |
| T5 | 235.16 | 300 | 70548 | 27159.80 | 43388.20 | 1.60 |
| T6 | 267.44 | 300 | 80232 | 27942.38 | 52289.62 | 1.87 |
| T7 | 277.86 | 300 | 83358 | 28203.20 | 55154.80 | 1.96 |
| T8 | 287.24 | 300 | 86172 | 28464.14 | 57707.86 | 2.03 |
| T9 | 235.83 | 300 | 70749 | 27159.80 | 43589.20 | 1.62 |
| T10 | 267.23 | 300 | 80169 | 27942.38 | 52226.62 | 1.87 |
| T11 | 287.87 | 300 | 86361 | 28203.20 | 58157.80 | 2.06 |
| T12 | 308.50 | 300 | 92550 | 28464.14 | 64085.86 | 2.25 |

**Supplementary Table 3:** Treatment wise economic estimation of crop
